# Supplementary material for: ISL1 Protein Transduction Promotes Cardiomyocyte Differentiation from Human Embryonic Stem Cells
Source: PLOS journal article supplement (doi:10.1371/journal.pone.0055577), 2013-01-30
Supplement: S2 (10.1371/journal.pone.0055577.s002) [file journal.pone.0055577.s002]

**Supplementary Table-1.** Primers and reaction conditions used in real time RT-PCR analysis.

| **Gene** | **Primer sequence (5'→3')** | **AT (°C)** | **Length (bp)** | **Cycle** | **Accession No.** |
| --- | --- | --- | --- | --- | --- |
| ***Gapdh*** | F: CTCATTTCCTGGTATGACAACGA  R: CTTCCTCTTGTGCTCTTGCT | 60 | 122 | 35 | NM_001256799 |
| ***Brachyury*** | F: AATTGGTCCAGCCTTGGAAT  R: CGTTGCTCACAGACCACA | 60 | 112 | 35 | NM_003181.2 |
| ***Isl1***  ***Mef2c***  ***Gata4***  ***Nkx2-5***  ***Tbx5***  ***Actinin***  ***MHC***  ***cTnT***  ***Mlc2v***  ***Nestin***  ***Map2***  ***Mlc2a***  ***Hand1*** | F: TACAAAGTTACCAGCCACC  R: GGAAGTTGAGAGGACATTGA  F: TCCGAGTTCTTATTCCACC  R: ATCCTCCCATTCCTTGTC  F: CCTGTCATCTCACTACGG  R: GCTGTTCCAAGAGTCCTG  F: TCTATCCACGTGCCTACAG  R: CCTCTGTCTTCTCCAGCTC  F: CGATCACAGATACAAATTCGC  R: CAGGTGGTTGTTGGTGAGC  F: TCCACCAATCCCTACATCAC  R: CCTCTCGTTTACCTGCTG  F: ACCCAAGTTCGACAAAATCG  R: TAAGGGTTGACGGTGACACA  F: ATGATGCATTTTGGGGGTTA  R: CAGCACCTTCCTCCTCTCAG  F: CTTGGGCGAGTGAACGT  R: CTGGTCAACCTCCTCCTTG  F: TCCAGGAACGGAAAATCAAG  R: GCCTCCTCATCCCCTACTTC  F: TGAAGAACATCCGCCACA  R: CTTGACATTACCACCTCCAG  F: AGAAGCTCAATGGGACAGAC  R: CTTGTCTGCCTGGGTCAG  F: AACCTCAGCCCTATCTCC  R: CTTTCATCTTCCTGCGTC | 60  60  60  60  60  60  60  60  60  60  60  60  60 | 156  168  180  104  110  129  141  108  229  120  136  124  150 | 35  35  35  35  35  35  35  35  35  35  35  35  35 | NM_002202  NM_002397.3  NM_002052.3  NM_004387  NM_080718.1  NM_001104.1  NM_000257  NM_000364  NM_000432  NM_006617.1  NM_031845  [NM_021223.2](http://www.ncbi.nlm.nih.gov/nucleotide/50593014?report=genbank&log$=nucltop&blast_rank=1&RID=8WFZXX2C01R)  NM_004821.2 |
